# Supplementary material
Source: PubMed Central journal article supplement (PMC6137504)

## Supplementary Online Content

Bhatt M, Johnson DW, Taljaard M, et al; for the Sedation Safety Study Group of Pediatric Emergency Research Canada. Association of preprocedural fasting with outcomes of emergency department sedation in children. *JAMA Pediatr*. Published online May 7, 2018.  
doi:10.1001/jamapediatrics.2018.0830.

**eTable 1.** Adverse event definitions (Quebec Guidelines)

**eTable 2.** Multivariable penalized logistic regression analyses examining risk factors for sedation-related adverse events

**eFigure 1.** Restricted cubic spline plots with a) 5 knots b) 4 knots and c) 3 knots to examine the relationship between “any adverse event” and fasting duration for (i) solids and (ii) liquids

**eFigure 2.** Restricted cubic spline plots with a) 5 knots b) 4 knots and c) 3 knots to examine the relationship between “serious adverse events” and fasting duration for (i) solids and (ii) liquids

**eFigure 3.** Restricted cubic spline plots with a) 5 knots b) 4 knots and c) 3 knots to examine the relationship between “vomiting” and fasting duration for (i) solids and (ii) liquids

This supplementary material has been provided by the authors to give readers additional information about their work.

**eTable 1: Adverse event definitions (Quebec Guidelines)**

| Adverse Event                            | Definition                                                                                                                                                                                                                                                                                                                                                                                                                                                                                        |
|------------------------------------------|---------------------------------------------------------------------------------------------------------------------------------------------------------------------------------------------------------------------------------------------------------------------------------------------------------------------------------------------------------------------------------------------------------------------------------------------------------------------------------------------------|
| Oxygen Desaturation                      | Oxygen desaturation occurs <b>AND</b> one or more interventions are performed with the intention of improving the saturation. The interventions include: (a) Verbal cues (b) Tactile stimulation (c) Airway repositioning (d) Suctioning (e) Supplementing or increasing oxygen delivery (f) Oral or nasal airway (g) Application of positive pressure with bag mask but <i>without</i> assisted ventilation (h) Application of bag mask <i>with</i> assisted ventilation (i) Tracheal intubation |
| Vomiting                                 | The expulsion of gastric contents through the mouth or nose that occurs during either the Sedation phase (to include Induction and Maintenance) or the ED Recovery phase of sedation. If the timing and extent of vomiting presents a suspicion or confirmation of clinically apparent pulmonary aspiration, this adverse event must also be documented                                                                                                                                           |
| Apnea                                    | Cessation or pause of ventilatory effort <b>AND</b> one or more interventions are performed with the intention of stimulating or assisting ventilation. The interventions include: (a) Verbal cues (b) Tactile stimulation (c) Airway repositioning (d) Application of bag mask <i>with</i> assisted ventilation (e) Tracheal intubation                                                                                                                                                          |
| Partial Airway Obstruction               | Manifested by the presence of one or more of the following: a) Stridor b) Snoring and/or c) Chest wall and suprasternal retractions <b>AND</b> one or more of the following interventions are performed with the intention of relieving partial airway obstruction (a) Airway repositioning (b) Suctioning (c) Oral or nasal airway (d) Application of positive pressure with bag mask but <i>without</i> assisted ventilation                                                                    |
| Myoclonus                                | Involuntary, short contraction of some muscle fibers, of a whole muscle, or of different muscles of one group, leading to short observable movements of the corresponding body parts, usually not longer than 1/10 <sup>th</sup> of a second (100 milliseconds) <b>AND</b> required an intervention, administration of medications or interfered with the procedure                                                                                                                               |
| Paradoxical Response                     | Unanticipated restlessness or agitation in response to the administration of sedation drugs occurring during the Sedation phase <b>AND</b> results in the unplanned administration of reversal agents or alternative sedation drug(s), or results in a delay in the completion or discontinuation of the procedure                                                                                                                                                                                |
| Hypotension                              | Systolic blood pressure less than the 5 <sup>th</sup> percentile for age as defined by the American Heart Association for Pediatric Advanced Life Support <b>AND</b> one or more intervention is performed with the intention of improving the blood pressure. These interventions include administration of: (a) IV Fluid (b) Chest compressions (c) Administration of medications                                                                                                               |
| Seizure                                  | Temporary abnormal electro-physiologic phenomenon of the brain that manifests as involuntary contractions or series of contractions of the voluntary muscles. The contraction can be prolonged (tonic) or repeated (tonic-clonic). An extreme form of muscle rigidity with shaking can resemble seizure activity but confirming this would require the use of electroencephalography (EEG).                                                                                                       |
| Laryngospasm                             | Complete airway obstruction <b>WITH</b> oxygen desaturation due to involuntary and sustained closure of the vocal cords preventing effective ventilation that <b>REQUIRES</b> positive pressure ventilation with or without neuromuscular blockade to overcome the symptom.                                                                                                                                                                                                                       |
| Clinically Apparent Pulmonary Aspiration | Suspicion <b>OR</b> confirmation of oropharyngeal or gastric contents in the trachea during the sedation or immediate post-Sedation phase <b>AND</b> the                                                                                                                                                                                                                                                                                                                                          |

| Adverse Event                 | Definition                                                                                                                                                                                                                                                                                                                                                                                                                                                                                                                                                                                                                                                                                                                                     |
|-------------------------------|------------------------------------------------------------------------------------------------------------------------------------------------------------------------------------------------------------------------------------------------------------------------------------------------------------------------------------------------------------------------------------------------------------------------------------------------------------------------------------------------------------------------------------------------------------------------------------------------------------------------------------------------------------------------------------------------------------------------------------------------|
|                               | <p>appearance of respiratory signs and symptoms that were not present prior to the sedation. The new signs and symptoms must present before the end of the ED Recovery phase (see Figure 1 for Sedation Time Intervals).</p> <p>The patient must have <u>one or more</u> sign or symptom in <u>any</u> of the following three categories: (i) <u>Physical Signs:</u> Cough, crackles/rales, decreased breath sounds, tachypnea, wheezing, ronchi, respiratory distress (ii) <u>Oxygen Requirement:</u> Decrease in oxygen saturation from baseline requiring supplemental oxygen (iii) <u>Chest X-ray Findings:</u> Focal infiltrate or consolidation</p>                                                                                      |
| Bradycardia                   | <p>Heart rate less than 2 standard deviations below normal for age as described by the American Heart Association during the Sedation phase (includes Induction and Maintenance) or Physiologic Recovery phase. <u>AND</u> One or more intervention is performed with the intention of improving heart rate and cardiac output. The interventions include: (a) Tactile stimulation (b) Supplemental oxygen (c) Application of positive pressure with bag mask but <i>without</i> ventilation (CPAP) (d) Tracheal intubation (e) Chest compressions (f) Administration of medications</p>                                                                                                                                                       |
| Complete Airway Obstruction   | <p>Ventilatory effort with NO air exchange manifested by ALL of the following: a) Absence of upper airway (e.g. stridor or snoring) and breath sounds on auscultation b) Loss of CO<sub>2</sub> waveform (when capnography is used) <b>AND</b> one or more of the following interventions are performed with the intention of relieving complete airway obstruction (a) Airway repositioning (b) Suctioning (c) Oral or nasal airway placement (d) Application of positive pressure with bag mask but <i>without</i> assisted ventilation (CPAP) (e) Application of bag mask <i>with</i> assisted ventilation (f) Tracheal intubation (g) Administration of additional sedation agents (h) Administration of neuromuscular blockade agents</p> |
| Muscle Rigidity               | <p>Involuntary muscle stiffening in extension that can be associated with shaking <u>AND</u> interferes with the procedure, requiring an intervention or administration of medications.</p>                                                                                                                                                                                                                                                                                                                                                                                                                                                                                                                                                    |
| Permanent Neurological Injury | <p>A neurologic deficit that was not present prior to sedation and does not resolve</p>                                                                                                                                                                                                                                                                                                                                                                                                                                                                                                                                                                                                                                                        |
| Death                         | <p>The irreversible cessation of cerebral function, spontaneous function of the respiratory system and spontaneous function of the circulatory system</p>                                                                                                                                                                                                                                                                                                                                                                                                                                                                                                                                                                                      |

**eTable 2: Multivariable penalized logistic regression analyses examining risk factors for sedation-related adverse events**

| Variables                                                                           | Odds Ratio | 95% Confidence Interval | P value |
|-------------------------------------------------------------------------------------|------------|-------------------------|---------|
| <b>Dependent variable: any adverse events (number of events=717)<sup>a</sup></b>    |            |                         |         |
| Fasting duration for solids (hours)                                                 | 1.0        | 0.98 to 1.02            | 0.91    |
| Sedation medication                                                                 |            |                         | <0.0001 |
| - Ketamine                                                                          | REF        |                         |         |
| - Ketamine + Fentanyl                                                               | 2.51       | 1.78 to 3.49            |         |
| - Ketamine + Midazolam                                                              | 1.57       | 1.10 to 2.19            |         |
| - Ketamine + Propofol                                                               | 1.02       | 0.81 to 1.28            |         |
| - Others                                                                            | 0.72       | 0.35 to 1.33            |         |
| - Propofol + Fentanyl                                                               | 0.30       | 0.21 to 0.43            |         |
| - Propofol                                                                          | 0.4        | 0.24 to 0.63            |         |
| Age in years                                                                        | 1.08       | 1.05 to 1.10            | <0.0001 |
| Male                                                                                | 1.08       | 0.91 to 1.29            | 0.37    |
| Pre-procedural opioid                                                               | 1.66       | 1.39 to 1.99            | <0.0001 |
| Procedure type                                                                      |            |                         | 0.0002  |
| - Orthopedic reduction                                                              | REF        |                         |         |
| - Foreign body removal                                                              | 1.31       | 0.80 to 2.06            |         |
| - Abscess incision + drainage                                                       | 1.07       | 0.67 to 1.63            |         |
| - Laceration repair                                                                 | 1.66       | 1.29 to 2.13            |         |
| - Lumbar puncture                                                                   | 2.32       | 1.42 to 3.67            |         |
| - Other                                                                             | 1.32       | 0.94 to 1.82            |         |
| <b>Dependent variable: serious adverse events (number of events=68)<sup>b</sup></b> |            |                         |         |
| Fasting duration for solids (hours)                                                 | 1.01       | 0.95 to 1.07            | 0.64    |
| Sedation medication                                                                 |            |                         | <0.001  |

| Variables                                                              | Odds Ratio | 95% Confidence Interval | P value |
|------------------------------------------------------------------------|------------|-------------------------|---------|
| - Ketamine                                                             | Ref        |                         |         |
| - Ketamine + Fentanyl                                                  | 5.90       | 2.15 to 14.41           |         |
| - Ketamine + Midazolam                                                 | 3.64       | 1.12 to 9.60            |         |
| - Ketamine + Propofol                                                  | 4.33       | 2.20 to 8.57            |         |
| - Others                                                               | 2.64       | 0.29 to 10.82           |         |
| - Propofol + Fentanyl                                                  | 3.16       | 1.45 to 6.76            |         |
| - Propofol                                                             | 5.68       | 2.30 to 13.33           |         |
| Age in years                                                           | 1.05       | 0.98 to 1.12            | <0.0001 |
| Male                                                                   | 1.38       | 0.79 to 2.54            | 0.26    |
| Pre-procedural opioid                                                  | 1.57       | 0.93 to 2.65            | 0.08    |
| Procedure type                                                         |            |                         | 0.35    |
| - Orthopedic reduction                                                 | REF        |                         |         |
| - Foreign body removal                                                 | 0.45       | 0.004 to 3.35           |         |
| - Abscess incision + drainage                                          | 0.69       | 0.08 to 2.69            |         |
| - Laceration repair                                                    | 1.46       | 0.57 to 3.36            |         |
| - Lumbar puncture                                                      | 3.42       | 0.86 to 10.12           |         |
| - Other                                                                | 1.30       | 0.41 to 3.20            |         |
| Fasting duration for liquids (hours)                                   | 1.01       | 0.94 to 1.07            | 0.69    |
| Sedation medication                                                    |            |                         | <0.0001 |
| - Ketamine                                                             | REF        |                         |         |
| - Ketamine + Fentanyl                                                  | 5.90       | 2.15 to 14.42           |         |
| - Ketamine + Midazolam                                                 | 3.64       | 1.12 to 9.59            |         |
| - Ketamine + Propofol                                                  | 4.32       | 2.19 to 8.57            |         |
| - Others                                                               | 2.63       | 0.29 to 10.80           |         |
| - Propofol ± Fentanyl                                                  | 3.16       | 1.45 to 6.76            |         |
| - Propofol                                                             | 5.68       | 2.30 to 13.33           |         |
| Age years                                                              | 1.05       | 0.99 to 1.12            | 0.11    |
| Male                                                                   | 1.38       | 0.79 to 2.55            | 0.25    |
| Pre-procedural opioid                                                  | 1.57       | 0.93 to 2.65            | 0.08    |
| Procedure type                                                         |            |                         | 0.31    |
| - Orthopedic reduction                                                 | REF        |                         |         |
| - Foreign body removal                                                 | 0.45       | 0.004 to 3.34           |         |
| - Abscess incision + drainage                                          | 0.70       | 0.08 to 2.71            |         |
| - Laceration repair                                                    | 1.46       | 0.57 to 3.36            |         |
| - Lumbar puncture                                                      | 3.54       | 0.91 to 10.22           |         |
| - Other                                                                | 1.31       | 0.42 to 3.22            |         |
| <b>Dependent variable: vomiting (number of events=315)<sup>c</sup></b> |            |                         |         |
| Fasting duration for solids (hours)                                    | 1.00       | 0.97 to 1.02            | 0.79    |
| Sedation medication                                                    |            |                         | <0.001  |
| - Ketamine                                                             | Ref        |                         |         |
| - Ketamine + Fentanyl                                                  | 1.93       | 1.25 to 2.91            |         |
| - Ketamine + Midazolam                                                 | 0.91       | 0.54 to 1.46            |         |
| - Ketamine + Propofol                                                  | 0.26       | 0.16 to 0.40            |         |
| - Others                                                               | 0.15       | 0.02 to 0.55            |         |

| <b>Variables</b>                     | <b>Odds Ratio</b> | <b>95% Confidence Interval</b> | <b>P value</b> |
|--------------------------------------|-------------------|--------------------------------|----------------|
| - Propofol + Fentanyl                | 0.01              | <0.001 to 0.04                 |                |
| - Propofol                           | 0.01              | <0.001 to 0.09                 |                |
| Age in years                         | 1.12              | 1.09 to 1.15                   | <0.0001        |
| Male                                 | 1.01              | 0.79 to 1.30                   | 0.93           |
| Pre-procedural opioid                | 1.42              | 1.09 to 1.85                   | 0.01           |
| Pre-procedural ondasetron            | 0.54              | 0.41 to 0.71                   | <0.0001        |
| Procedure type                       |                   |                                | <0.001         |
| - Orthopedic reduction               | REF               |                                |                |
| - Foreign body removal               | 1.82              | 0.96 to 3.22                   |                |
| - Abscess incision + drainage        | 1.32              | 0.68 to 2.34                   |                |
| - Laceration repair                  | 1.72              | 1.19 to 2.46                   |                |
| - Lumbar puncture                    | 0.94              | 0.30 to 2.23                   |                |
| - Other                              | 0.95              | 0.54 to 1.56                   |                |
| Fasting duration for liquids (hours) | 1.00              | 0.96 to 1.03                   | 0.81           |
| Sedation medication                  |                   |                                | <0.001         |
| - Ketamine                           | REF               |                                |                |
| - Ketamine + Fentanyl                | 1.93              | 1.25 to 2.91                   |                |
| - Ketamine + Midazolam               | 0.91              | 0.54 to 1.45                   |                |
| - Ketamine + Propofol                | 0.26              | 0.16 to 0.40                   |                |
| - Others                             | 0.15              | 0.02 to 0.55                   |                |
| - Propofol ± Fentanyl                | 0.01              | <0.001 to 0.03                 |                |
| - Propofol                           | 0.01              | <0.001 to 0.09                 |                |
| Age years                            | 1.12              | 1.09 to 1.15                   | <0.0001        |
| Male                                 | 1.01              | 0.79 to 1.30                   | 0.93           |
| Pre-procedural opioid                | 1.42              | 1.09 to 1.85                   | 0.01           |
| Pre-procedural ondansetron           | 0.54              | 0.41 to 0.71                   | <0.0001        |
| Procedure type                       |                   |                                | 0.05           |
| - Orthopedic reduction               | REF               |                                |                |
| - Foreign body removal               | 1.82              | 0.96 to 3.22                   |                |
| - Abscess incision + drainage        | 1.31              | 0.68 to 2.33                   |                |
| - Laceration repair                  | 1.72              | 1.19 to 2.46                   |                |
| - Lumbar puncture                    | 0.93              | 0.30 to 2.20                   |                |
| - Other                              | 0.94              | 0.54 to 1.56                   |                |

<sup>a</sup>solid model: Hosmer Lemeshow test: P-value=0.83; fluid model: Hosmer Lemeshow test: P-value=0.88

<sup>b</sup>solid model: Hosmer Lemeshow test: P-value=0.75; fluid model: Hosmer Lemeshow test: P-value=0.82

<sup>c</sup>solid model: Hosmer Lemeshow test: P-value=0.27; fluid model: Hosmer Lemeshow test: P-value=0.31

**eFigure 1: Restricted cubic spline plots with a) 5 knots b) 4 knots and c) 3 knots to examine the relationship between “any adverse event” and fasting duration for (i) solids and (ii) liquids**

**eFigure 1.1: Any adverse event and NPO solid with 5 knots**

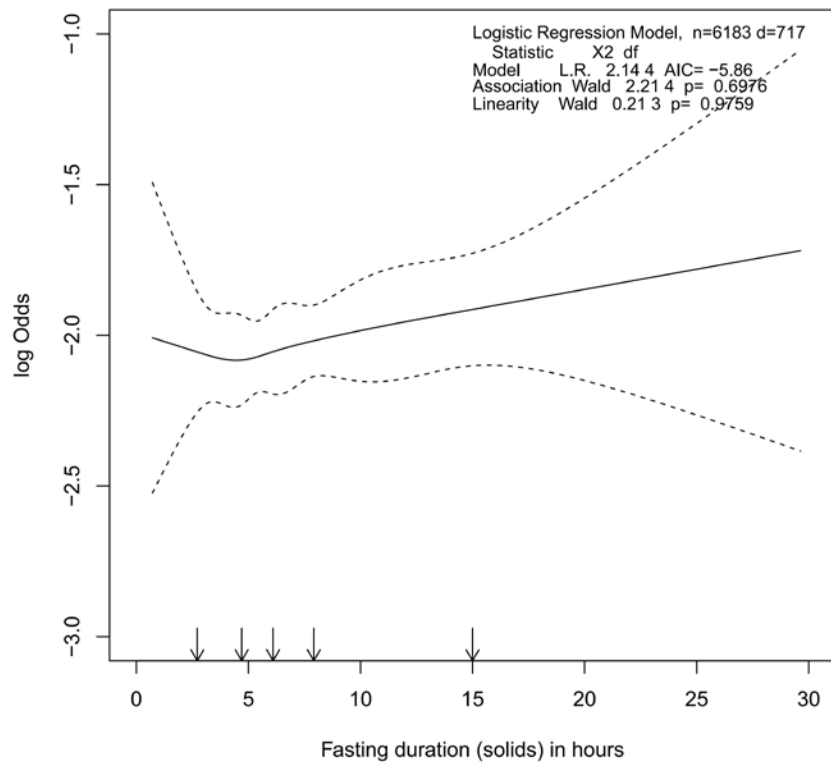

**eFigure 1.2: Any adverse event and NPO fluid with 5 knots**

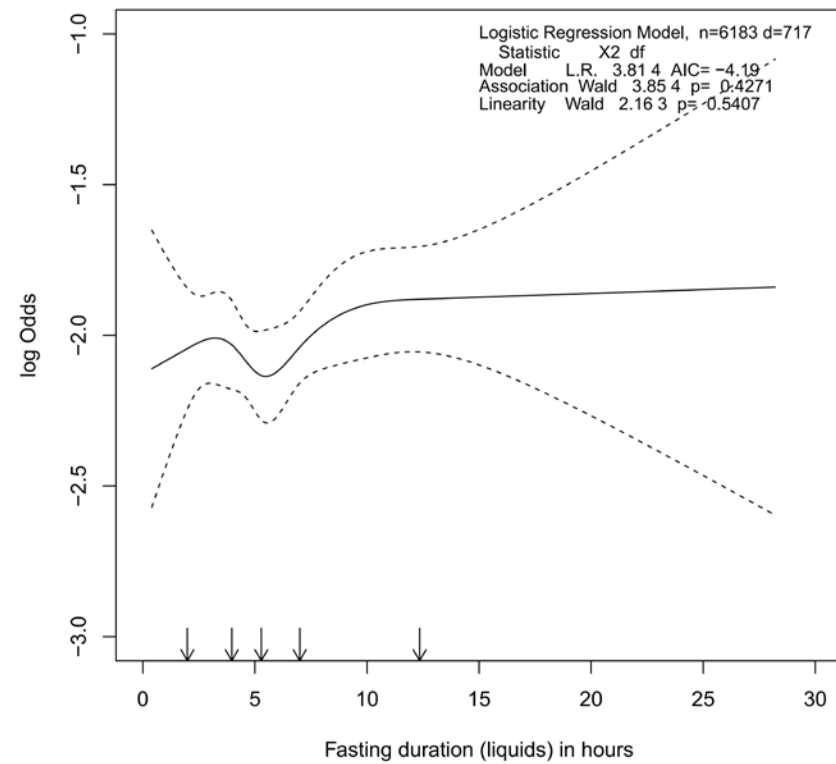

**eFigure 1 (continued): Restricted cubic spline plots with a) 5 knots b) 4 knots and c) 3 knots to examine the relationship between “any adverse event” and fasting duration for (i) solids and (ii) liquids**

**eFigure 1.3: Any adverse event and NPO solid with 4 knots**

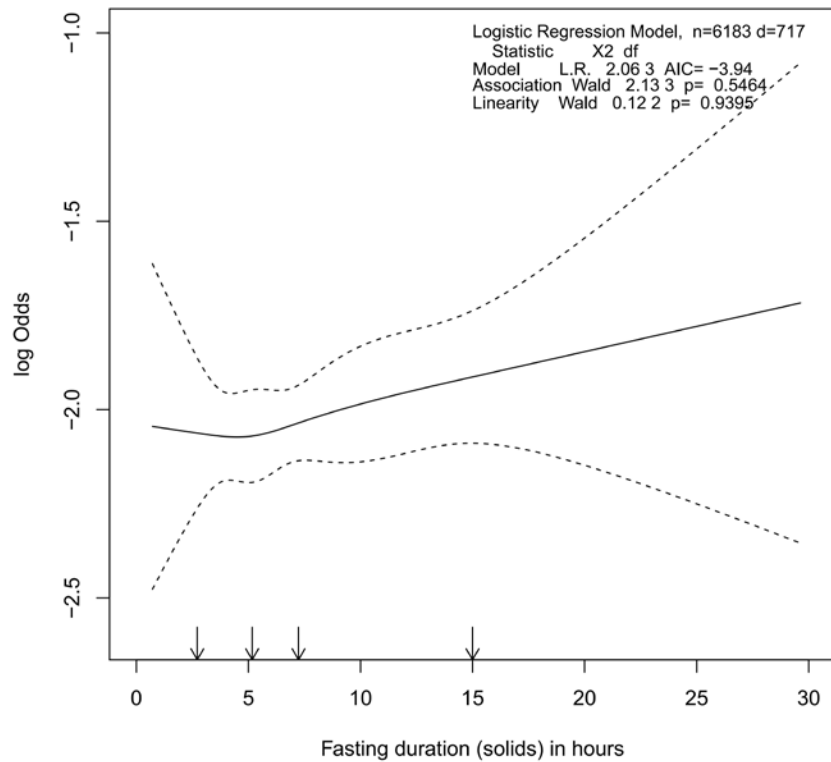

**eFigure 1.4: Any adverse event and NPO fluid with 4 knots**

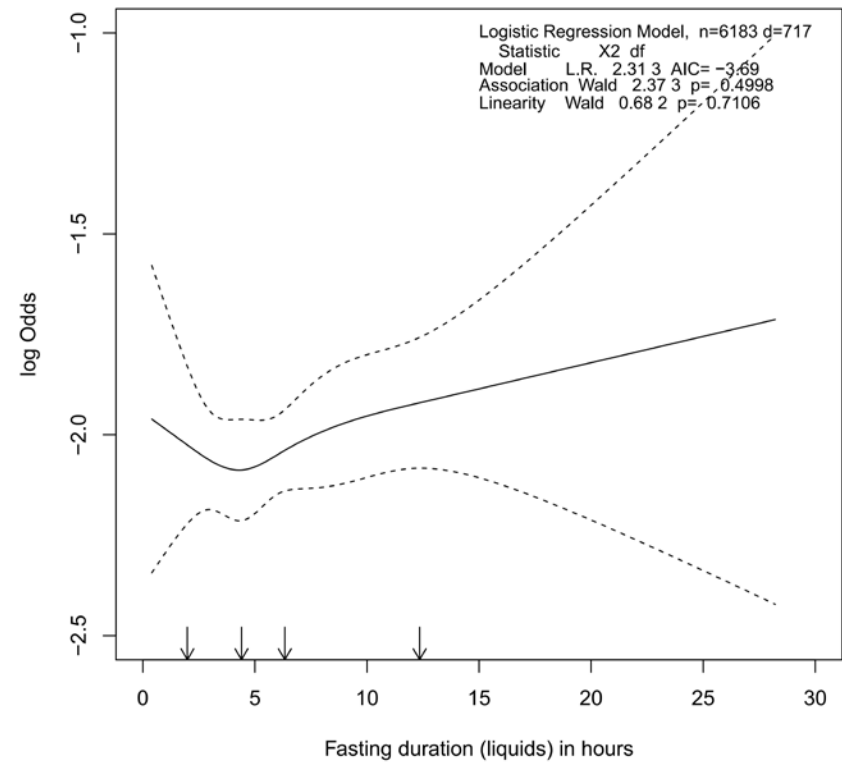



**eFigure 1 (continued): Restricted cubic spline plots with a) 5 knots b) 4 knots and c) 3 knots to examine the relationship between “any adverse event” and fasting duration for (i) solids and (ii) liquids**

**eFigure 1.5: Any adverse event and NPO solid with 3 knots**

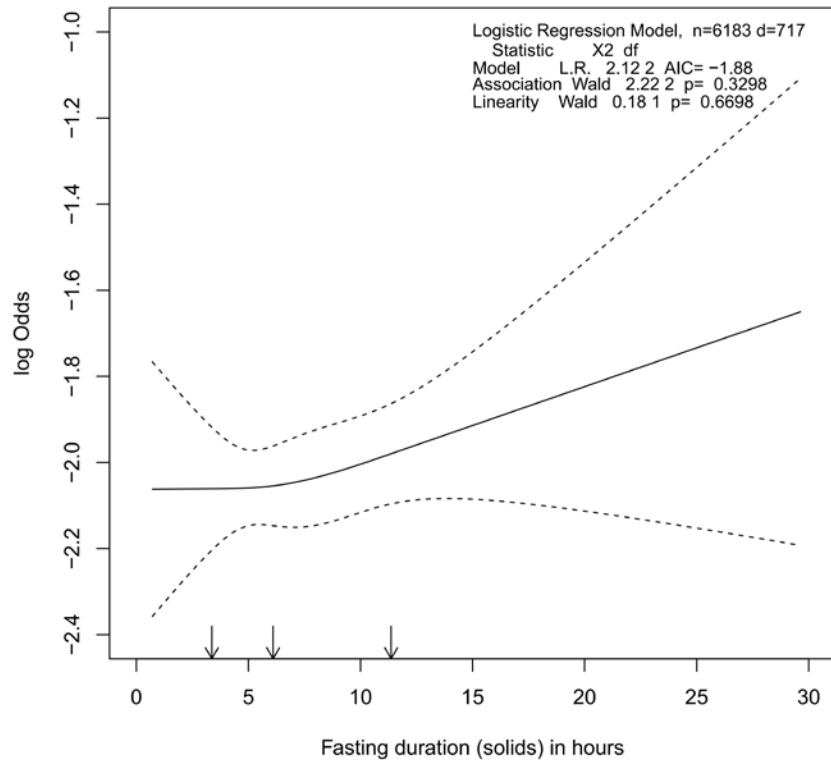

**eFigure 1.6: Any adverse event and NPO fluid with 3 knots**

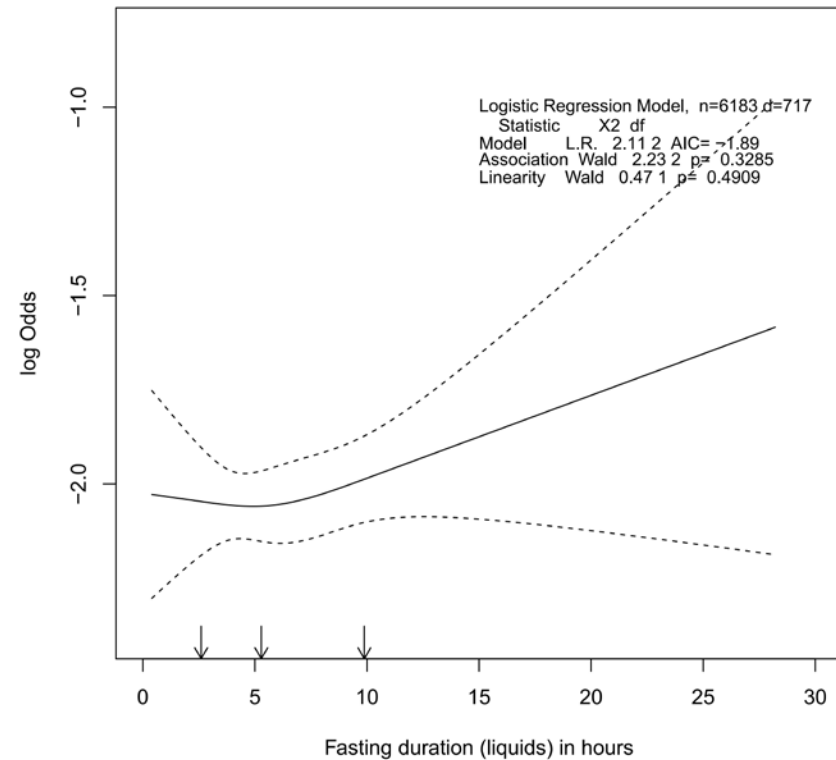

**eFigure 2: Restricted cubic spline plots with a) 5 knots b) 4 knots and c) 3 knots to examine the relationship between “serious adverse events” and fasting duration for (i) solids and (ii) liquids**

**eFigure 2.1: Serious event and NPO solid with 5 knots**

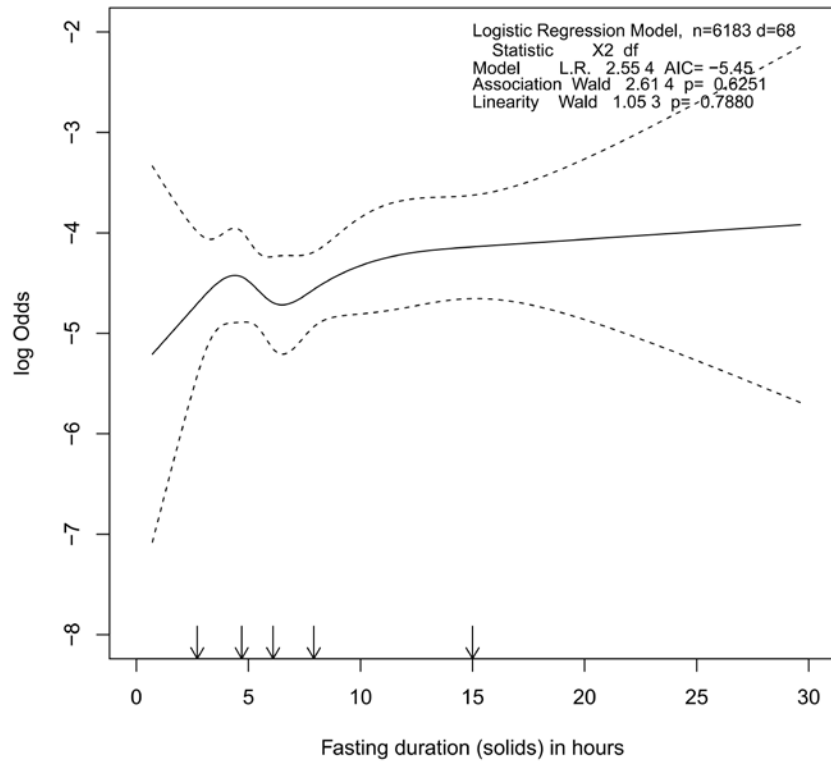

**eFigure 2.2: Serious event and NPO fluid with 5 knots**

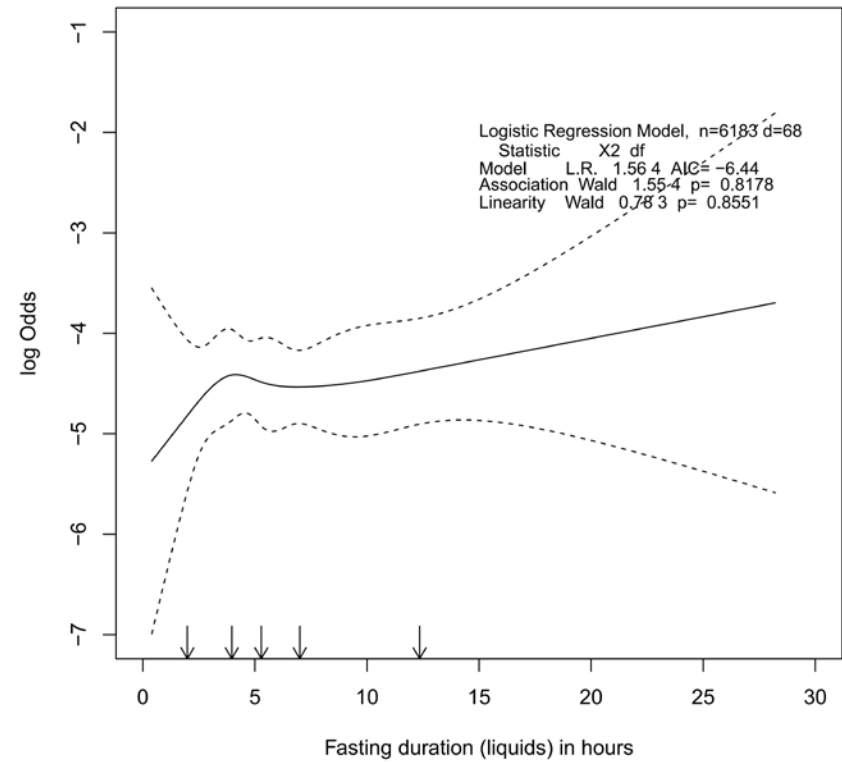

**eFigure 2 (continued): Restricted cubic spline plots with a) 5 knots b) 4 knots and c) 3 knots to examine the relationship between “serious adverse events” and fasting duration for (i) solids and (ii) liquids**

**eFigure 2.3: Serious event and NPO solid with 4 knots**

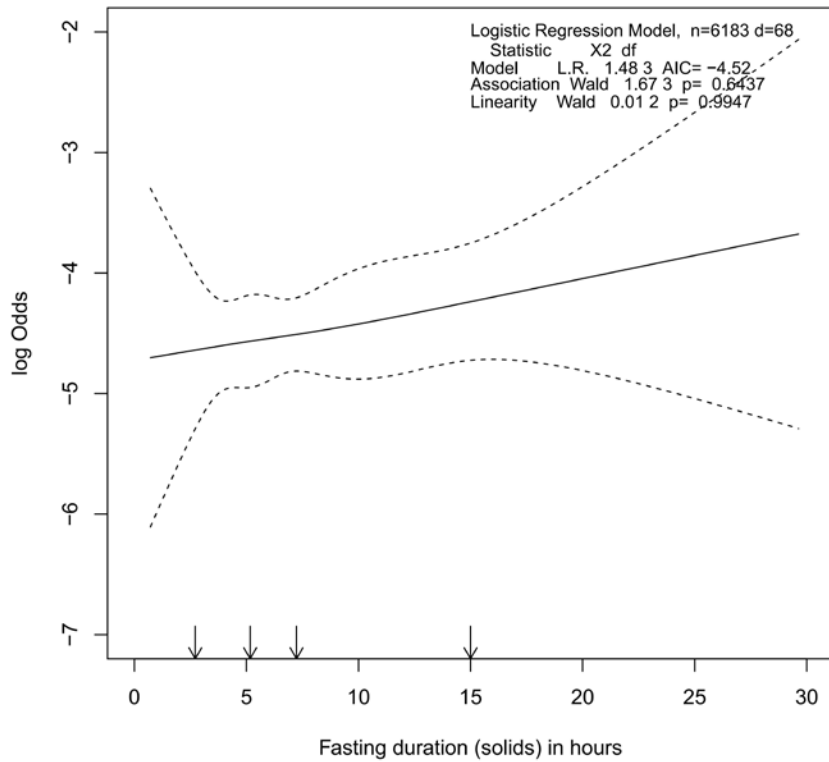

**eFigure 2.4: Serious event and NPO fluid with 4 knots**

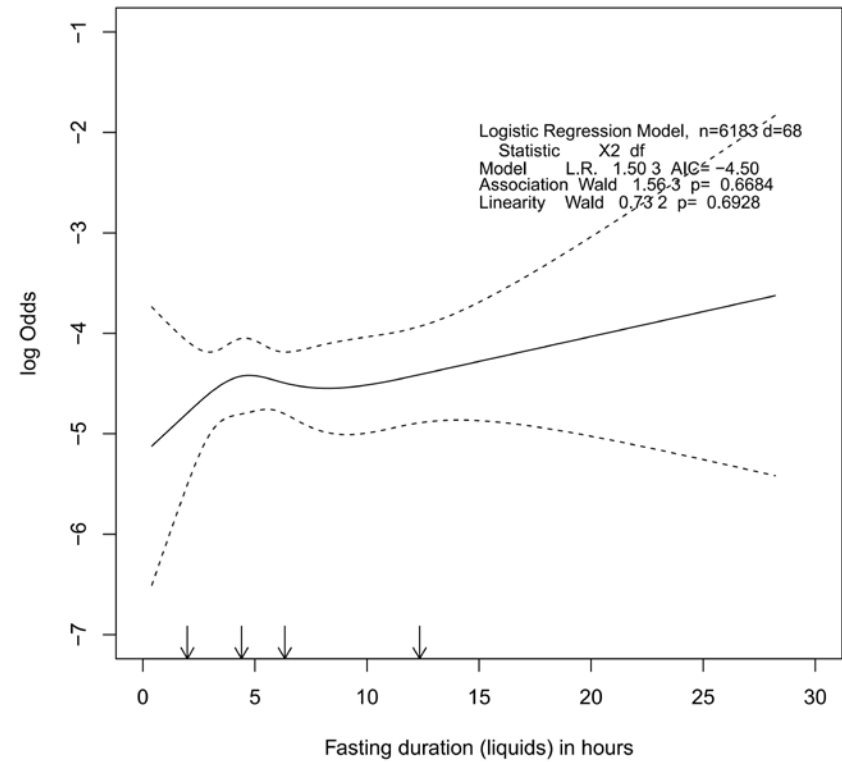

**eFigure 2 (continued): Restricted cubic spline plots with a) 5 knots b) 4 knots and c) 3 knots to examine the relationship between “serious adverse events” and fasting duration for (i) solids and (ii) liquids**

**eFigure 2.5: Serious event and NPO solid with 3 knots**

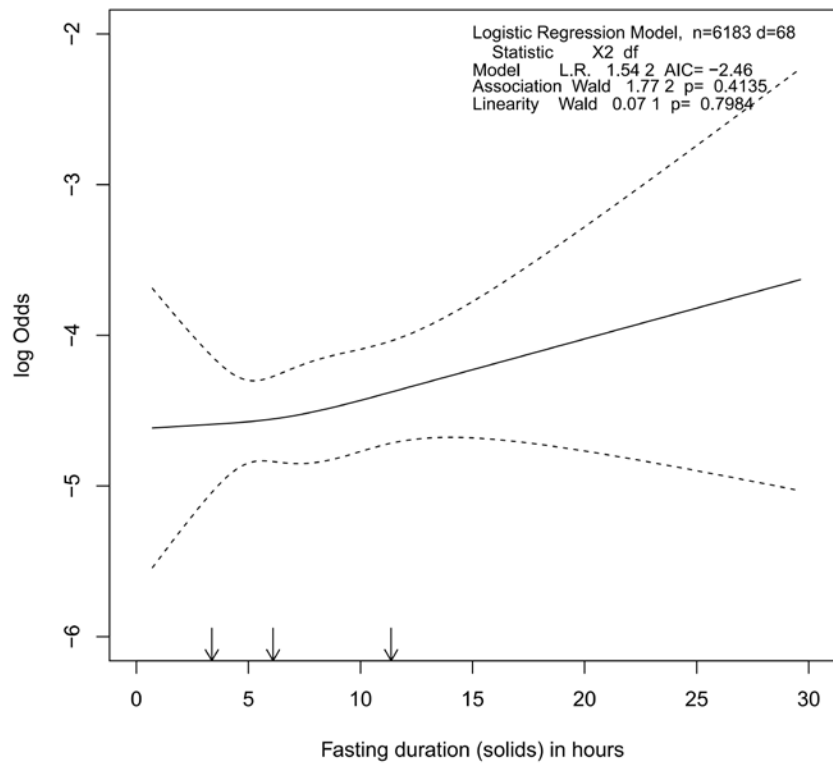

**eFigure 2.6: Serious event and NPO fluid with 3 knots**

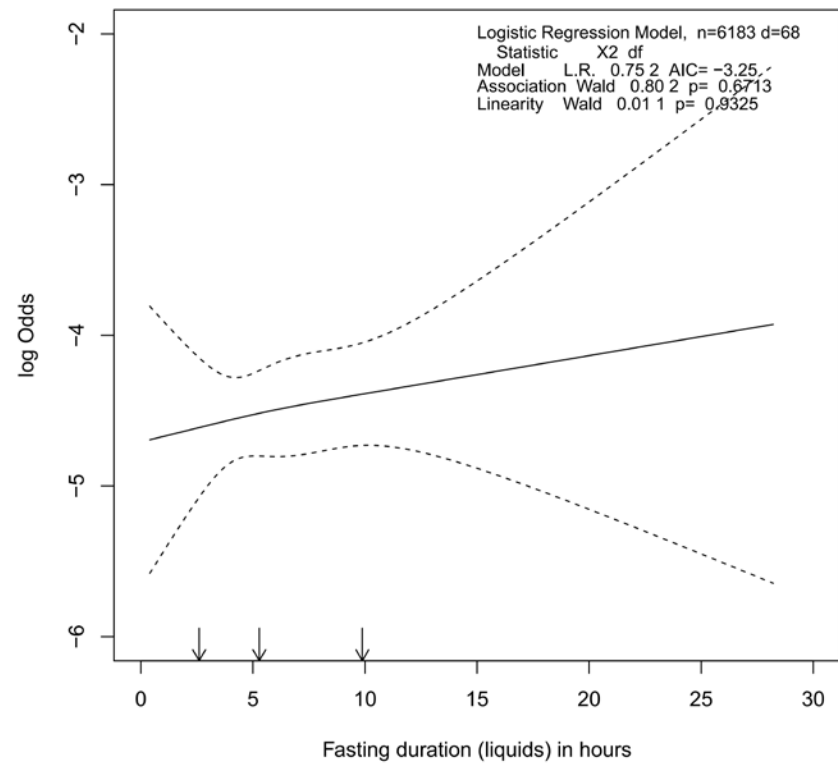

**eFigure 3: Restricted cubic spline plots with a) 5 knots b) 4 knots and c) 3 knots to examine the relationship between “vomiting” and fasting duration for (i) solids and (ii) liquids**

**eFigure 3.1: Vomiting and NPO solid with 5 knots**

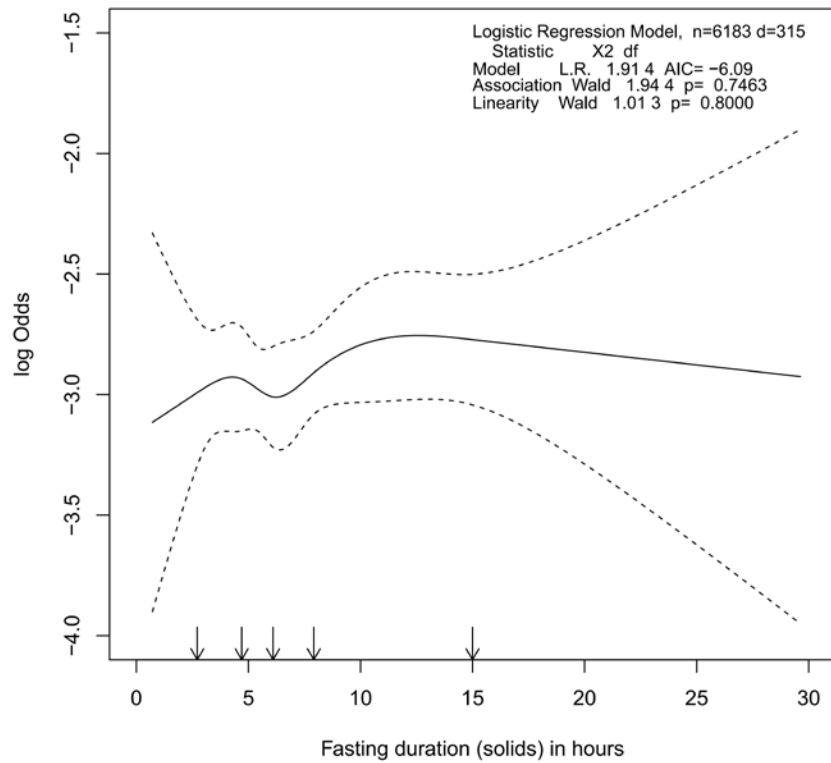

**eFigure 3.2: Vomiting and NPO fluid with 5 knots**

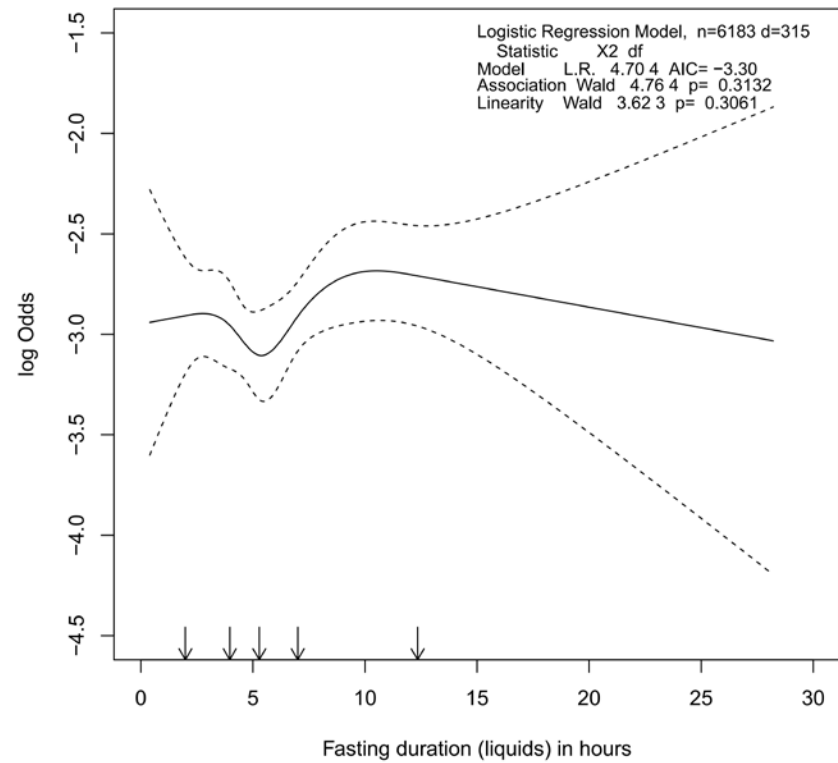

**eFigure 3 (continued): Restricted cubic spline plots with a) 5 knots b) 4 knots and c) 3 knots to examine the relationship between “vomiting” and fasting duration for (i) solids and (ii) liquids**

**eFigure 3.3: Vomiting and NPO solid with 4 knots**

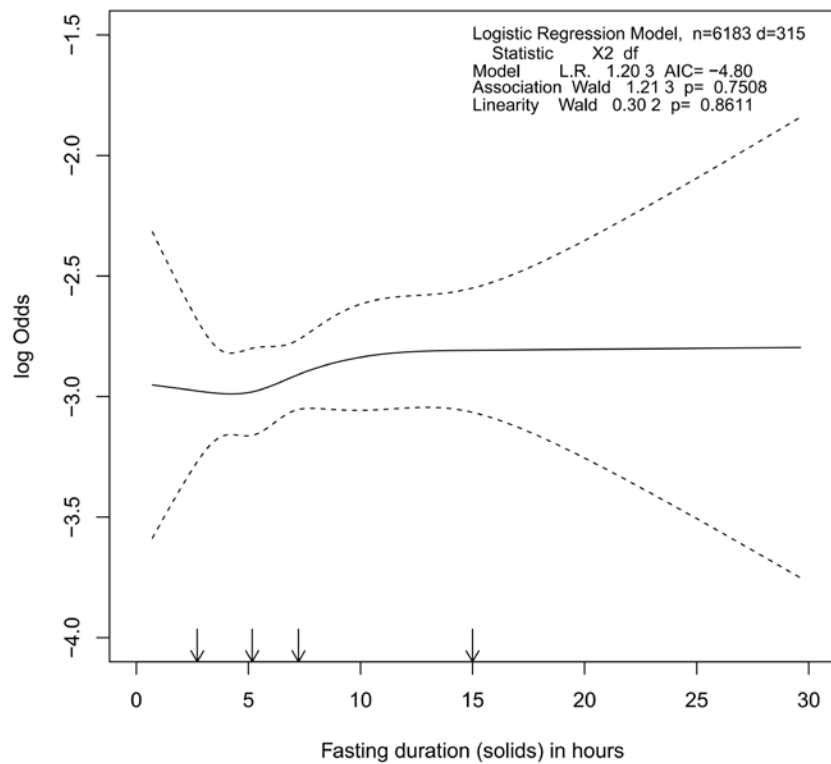

**eFigure 3.4: Vomiting and NPO fluid with 4 knots**

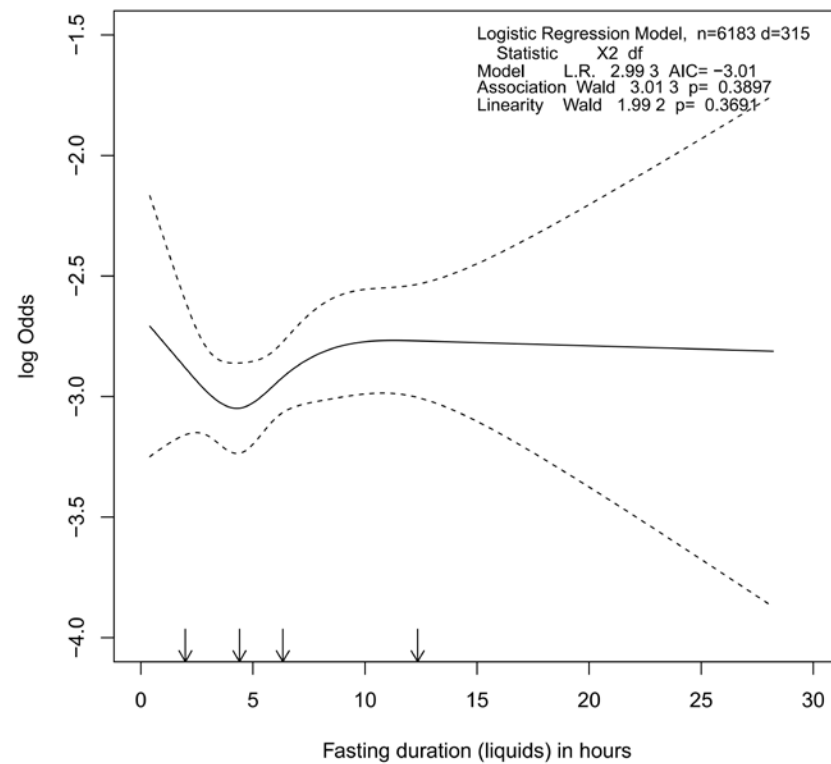

**eFigure 3 (continued): Restricted cubic spline plots with a) 5 knots b) 4 knots and c) 3 knots to examine the relationship between “vomiting” and fasting duration for (i) solids and (ii) liquids**

**eFigure 3.5: Vomiting and NPO solid with 3 knots**

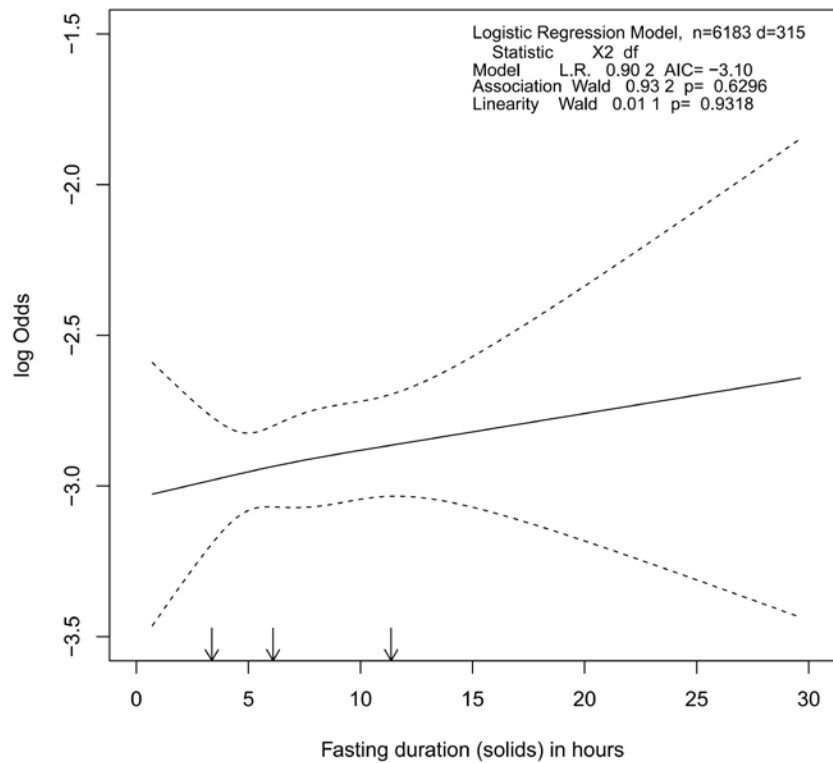

**eFigure 3.6: Vomiting and NPO fluid with 3 knots**

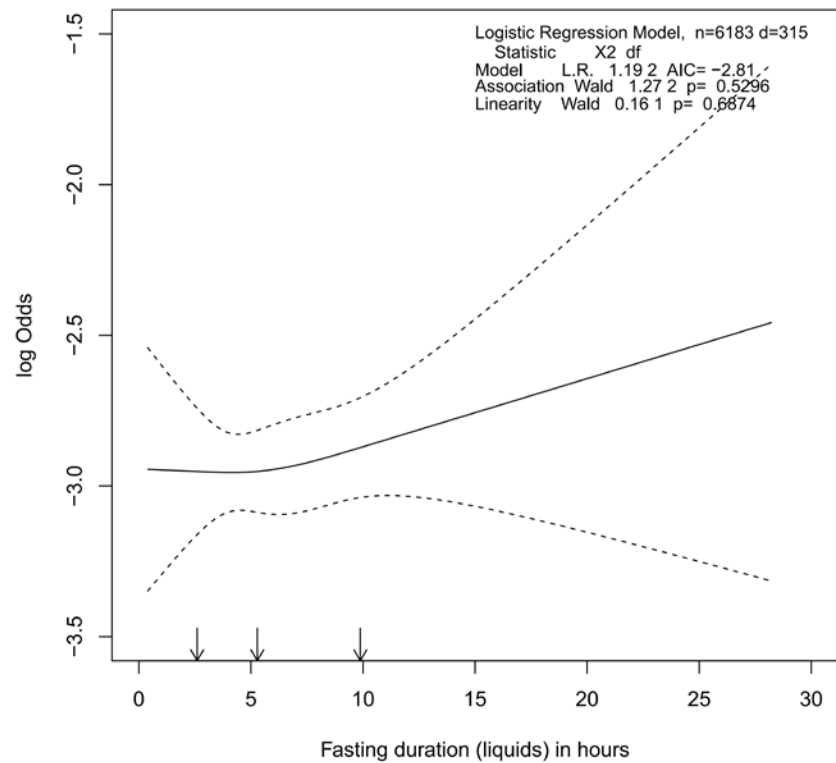

Supplement: jamapediatr-e180830-s001.pdf [file jamapediatr-e180830-s001.pdf]
